# Supplementary material for: The Reporting Frequency of Ketoacidosis Events with Dapagliflozin from the European Spontaneous Reporting System: The DAPA-KETO Study
Source: MDPI journal article supplement (doi:10.3390/ph15030286), 2022-02-25
Supplement: s1 [file s1]

## SUPPLEMENTARY MATERIAL

### RESULTS

**Table S1.** Drugs included in reference groups.

| Reference group                             | Drugs                                                                                                                                                                                                                                     |
|---------------------------------------------|-------------------------------------------------------------------------------------------------------------------------------------------------------------------------------------------------------------------------------------------|
| Dipeptidyl peptidase-4 inhibitors (DPP-4is) | Alogliptin, linagliptin, saxagliptin, sitagliptin, and vildagliptin                                                                                                                                                                       |
| Insulins                                    | Insulin aspart, bovine insulin, insulin degludec, insulin detemir, insulin glargine, insulin glulisine, human insulin, insulin lispro, insulin glargine/lixisenatide, porcine insulin, insulin zinc, and insulin aspart/ insulin degludec |
| Other SGLT2-inhibitors                      | Canagliflozin, empagliflozin, and ertugliflozin                                                                                                                                                                                           |

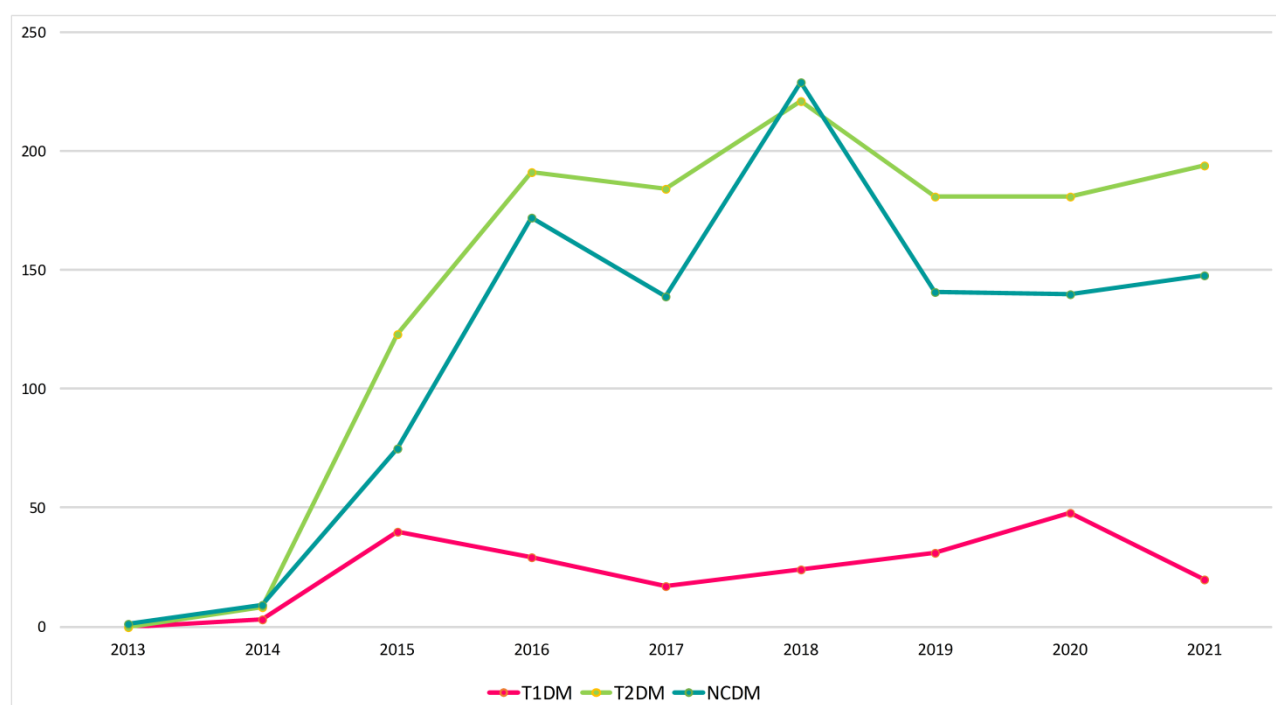

**Figure S1.** Trend of ketoacidosis adverse events with dapagliflozin for each type of diabetes mellitus.

\*No case of ketoacidosis was reported in 2012

*T1DM: type 1 diabetes mellitus, T2DM: type 2 diabetes mellitus, NCDM: not classifiable diabetes mellitus*

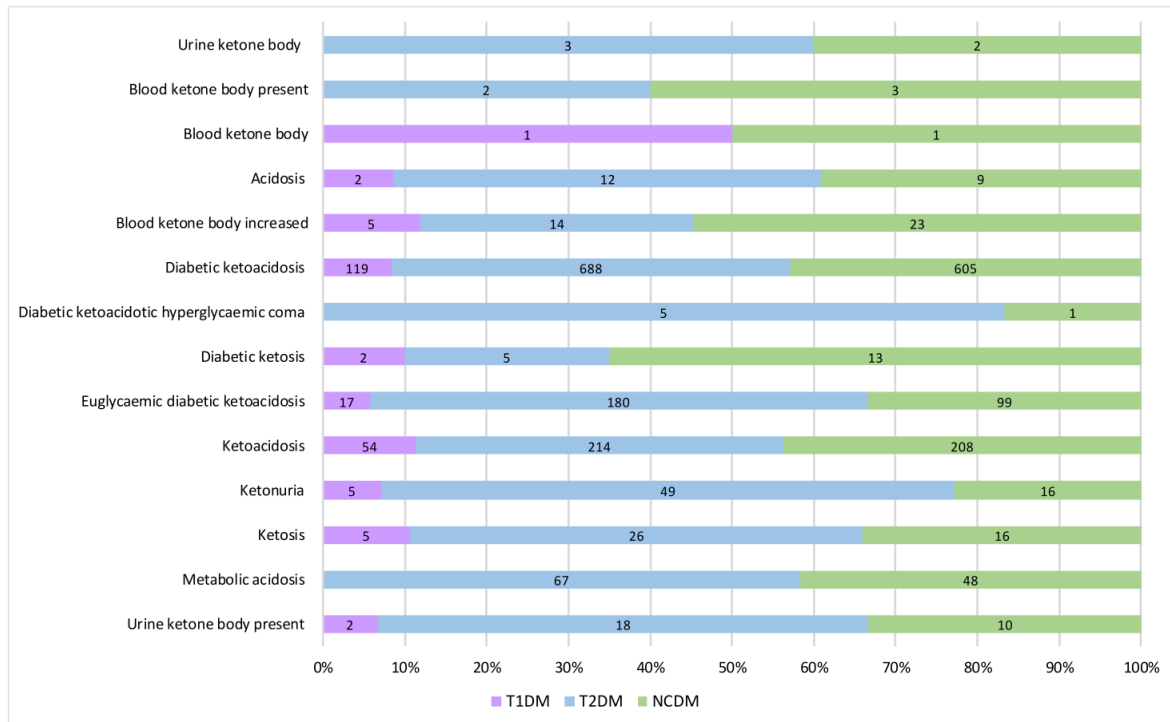

**Figure S2.** ketoacidosis adverse events for type of diabetes mellitus.  
*T1DM: type 1 diabetes mellitus, T2DM: type 2 diabetes mellitus, NCDM: not classifiable diabetes mellitus*

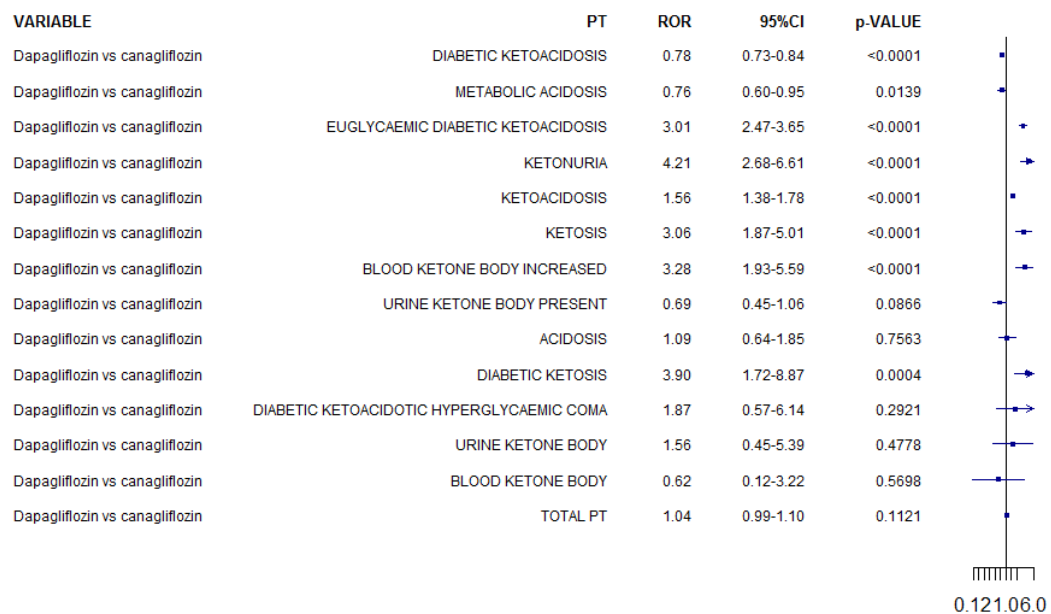

**Figure S3.** ROR of ICSRs with ketoacidosis adverse events for dapagliflozin compared to canagliflozin in all diabetes mellitus cases.

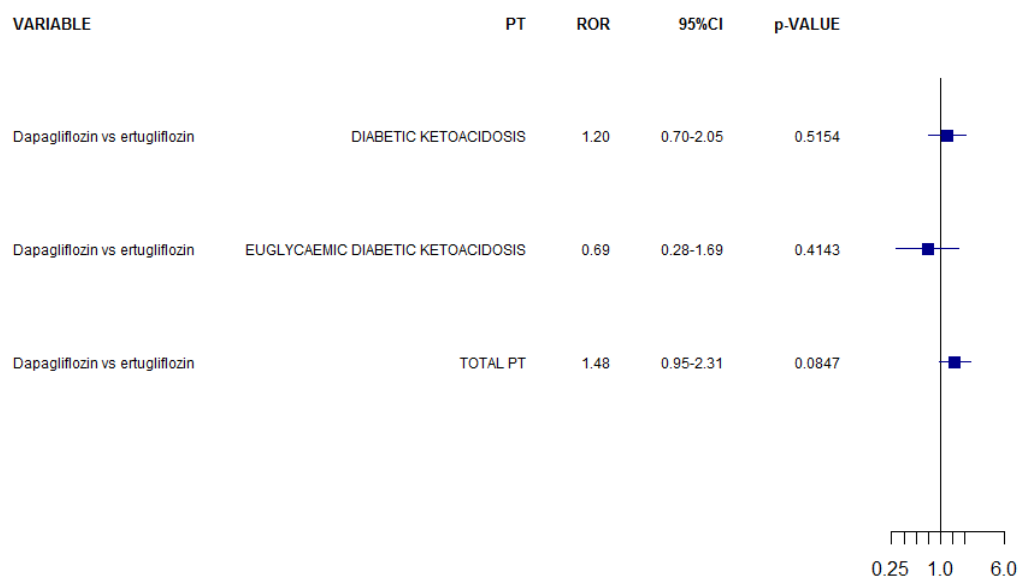

**Figure S4.** ROR of ICSRs with ketoacidosis adverse events for dapagliflozin compared to ertugliflozin in all diabetes mellitus cases.

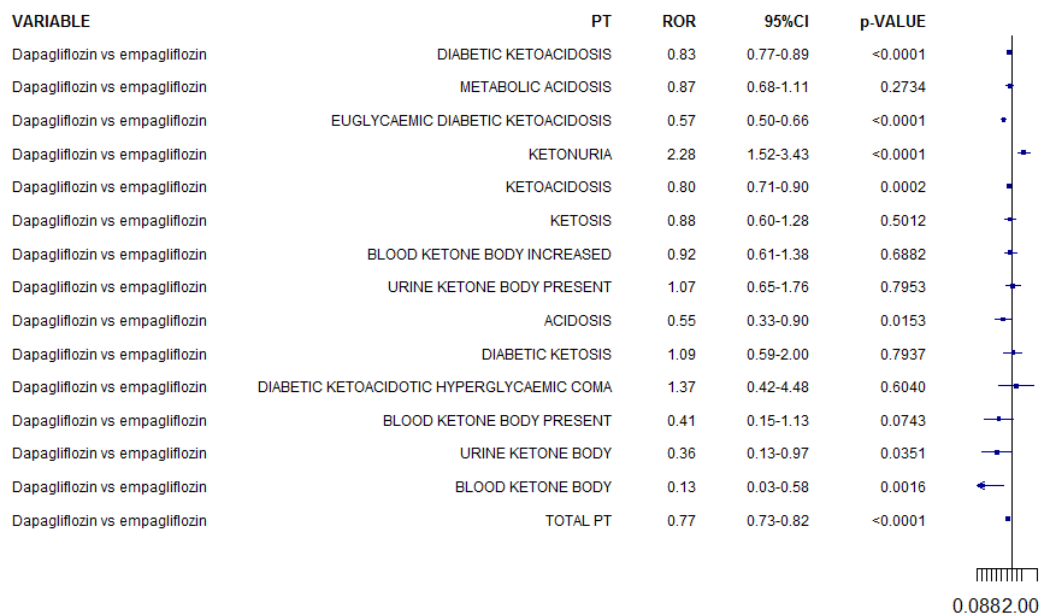

**Figure S5.** ROR of ICSRs with ketoacidosis adverse events for dapagliflozin compared to empagliflozin in all diabetes mellitus cases.

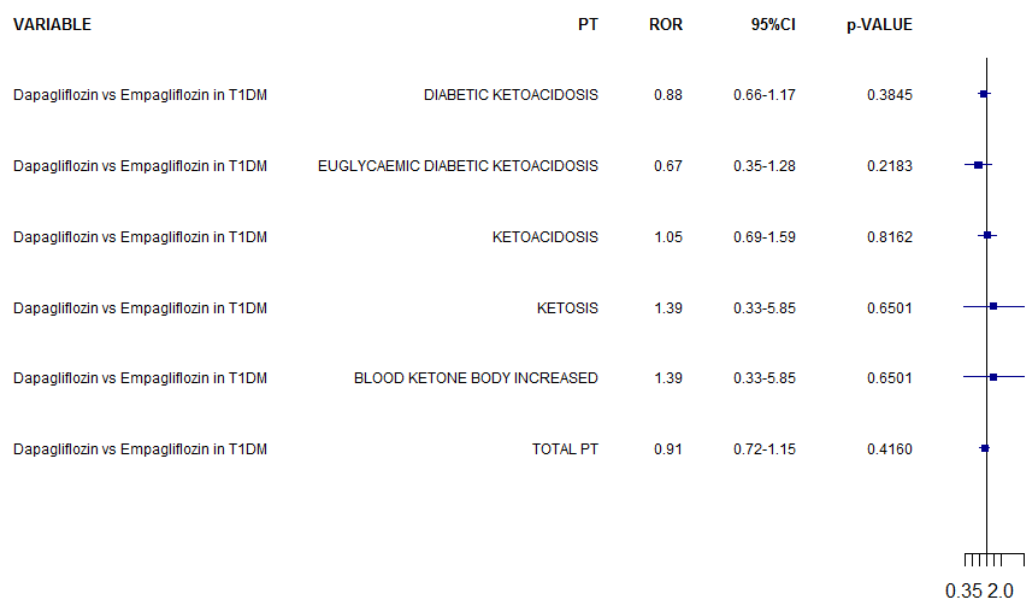

**Figure S6.** ROR of ICSRs with ketoacidosis adverse events for dapagliflozin compared to empagliflozin in T1DM.

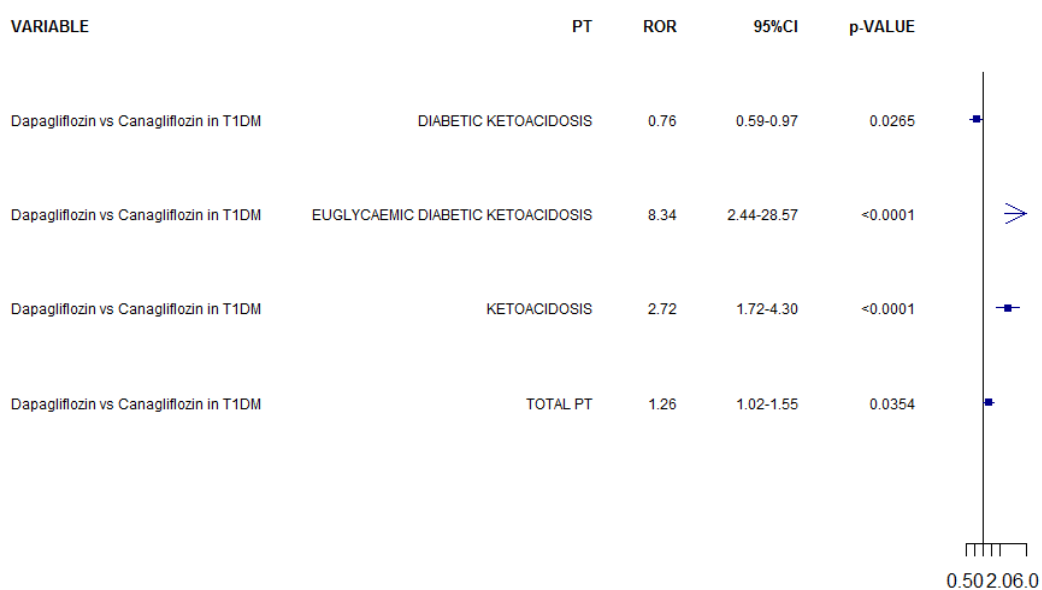

**Figure S7.** ROR of ICSRs with ketoacidosis adverse events for dapagliflozin compared to canagliflozin in T1DM.
